# Supplementary material for: Coding of latent variables in sensory, parietal, and frontal cortices during closed-loop virtual navigation
Source: eLife journal article supplement (doi:10.7554/elife.80280), 2022-10-25
Supplement: mdarchecklist1 [file Figure2 supplement5.pdf › Figure2 supplement5.pdf]

theta ph.

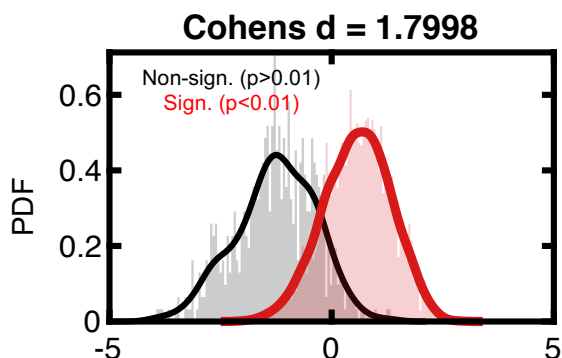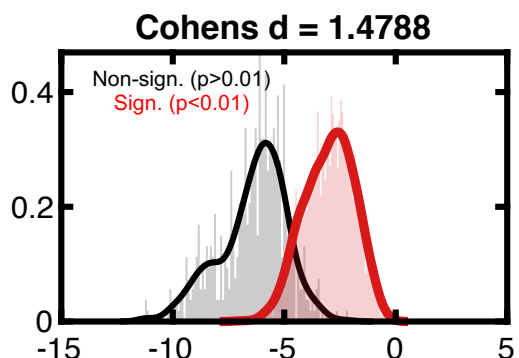

alpha ph.

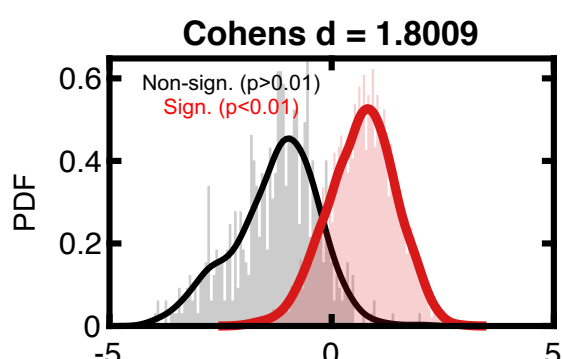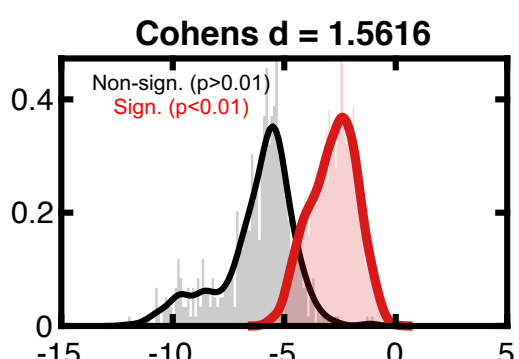

beta ph.

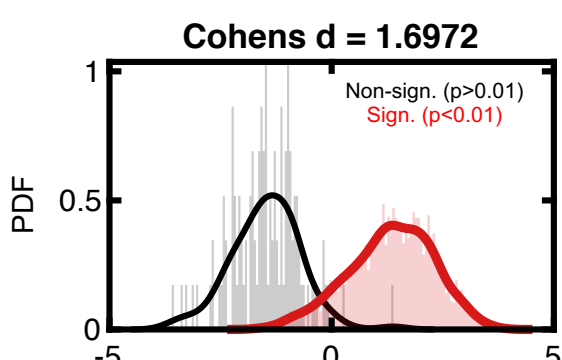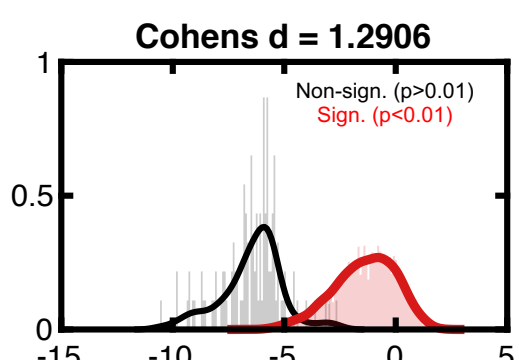

log (max FR– min FR)

log (mutual information)
