# Supplementary material for: Coding of latent variables in sensory, parietal, and frontal cortices during closed-loop virtual navigation
Source: eLife journal article supplement (doi:10.7554/elife.80280), 2022-10-25

**A**

Example Trial 1

Example Trial 2

Example Trial 3

Example Trial 4

Raw LFP

Theta

Phase

Bandpass

Alpha

Phase

Bandpass

Beta

Phase

Bandpass

● ● ● Spike

**B**

No phase modulation

2 examples

Only Beta phase modulation

2 examples

All frequencies phase modulation

2 examples

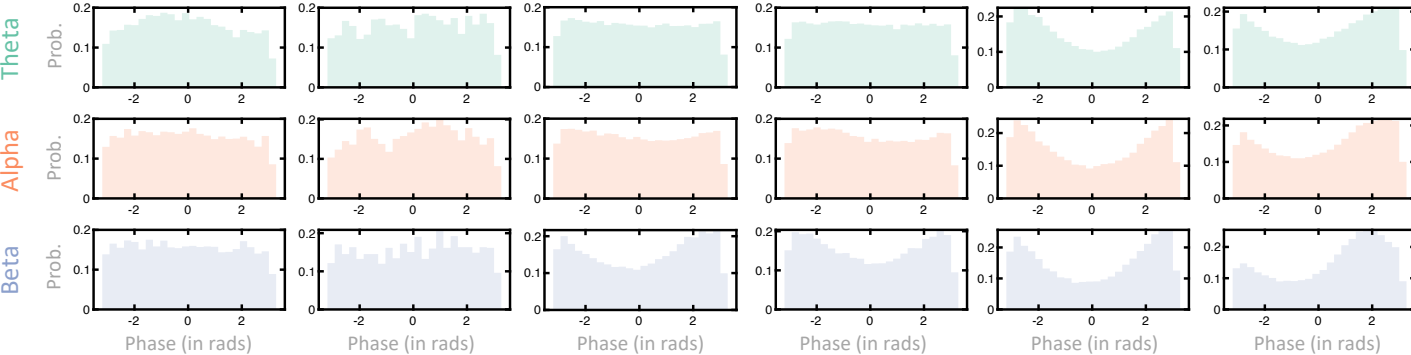

Supplement: mdarchecklist1 [file Figure2 supplement8.pdf › Figure2 supplement8.pdf]
