# Supplementary material for: Coding of latent variables in sensory, parietal, and frontal cortices during closed-loop virtual navigation
Source: eLife journal article supplement (doi:10.7554/elife.80280), 2022-10-25

MSTd  
7a  
dIPFC

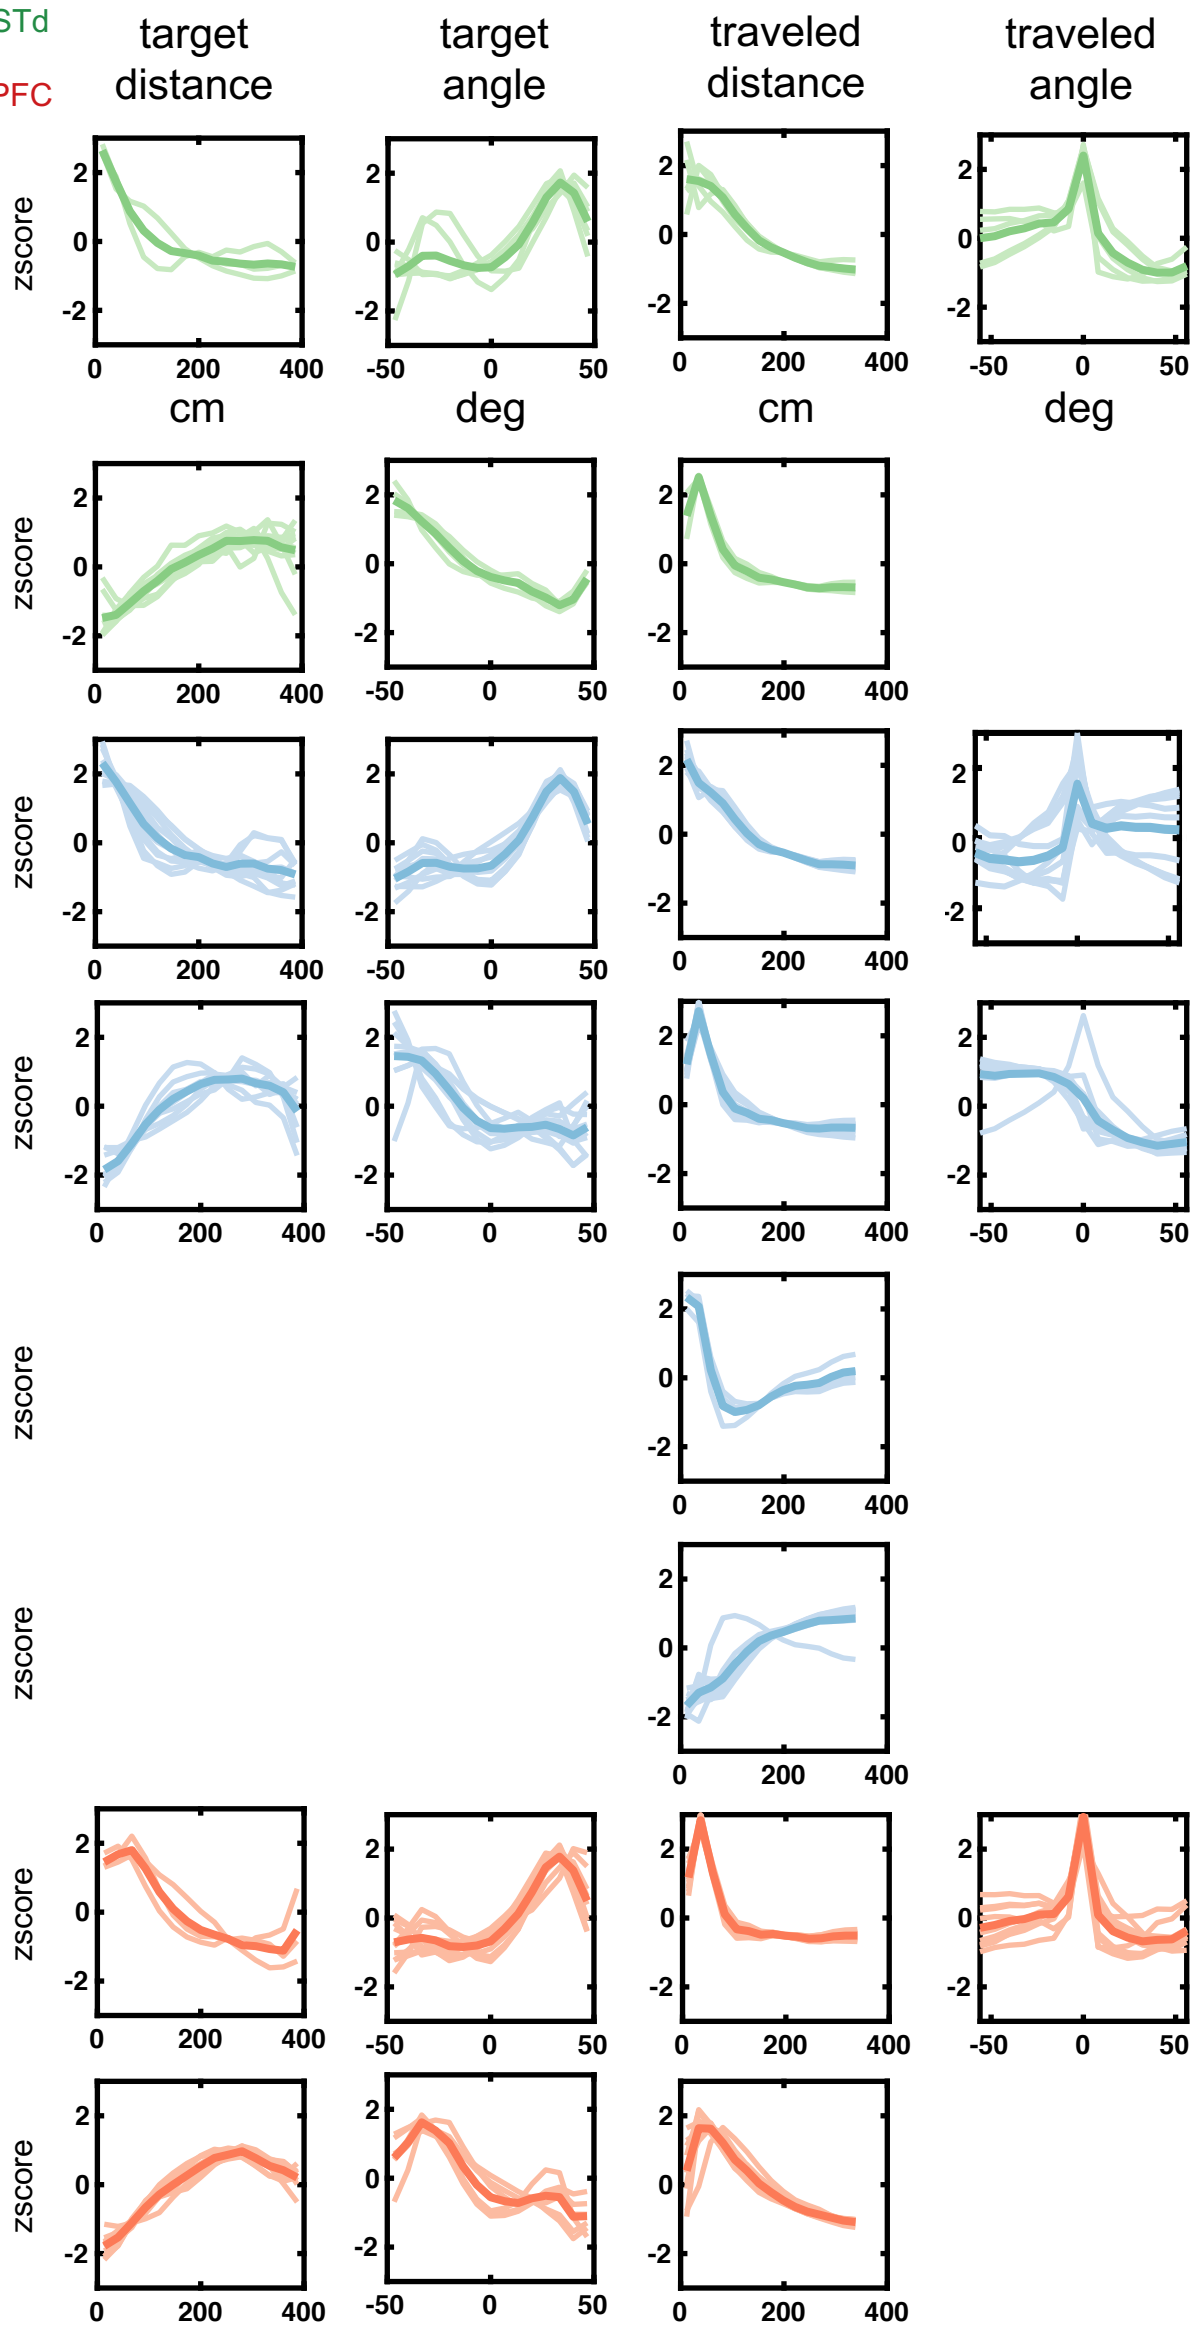

Supplement: mdarchecklist1 [file Figure3 supplement2.pdf › Figure3 supplement2.pdf]
