# Supplementary material for: Coding of latent variables in sensory, parietal, and frontal cortices during closed-loop virtual navigation
Source: eLife journal article supplement (doi:10.7554/elife.80280), 2022-10-25

sensorimotor

latent

LFP

other

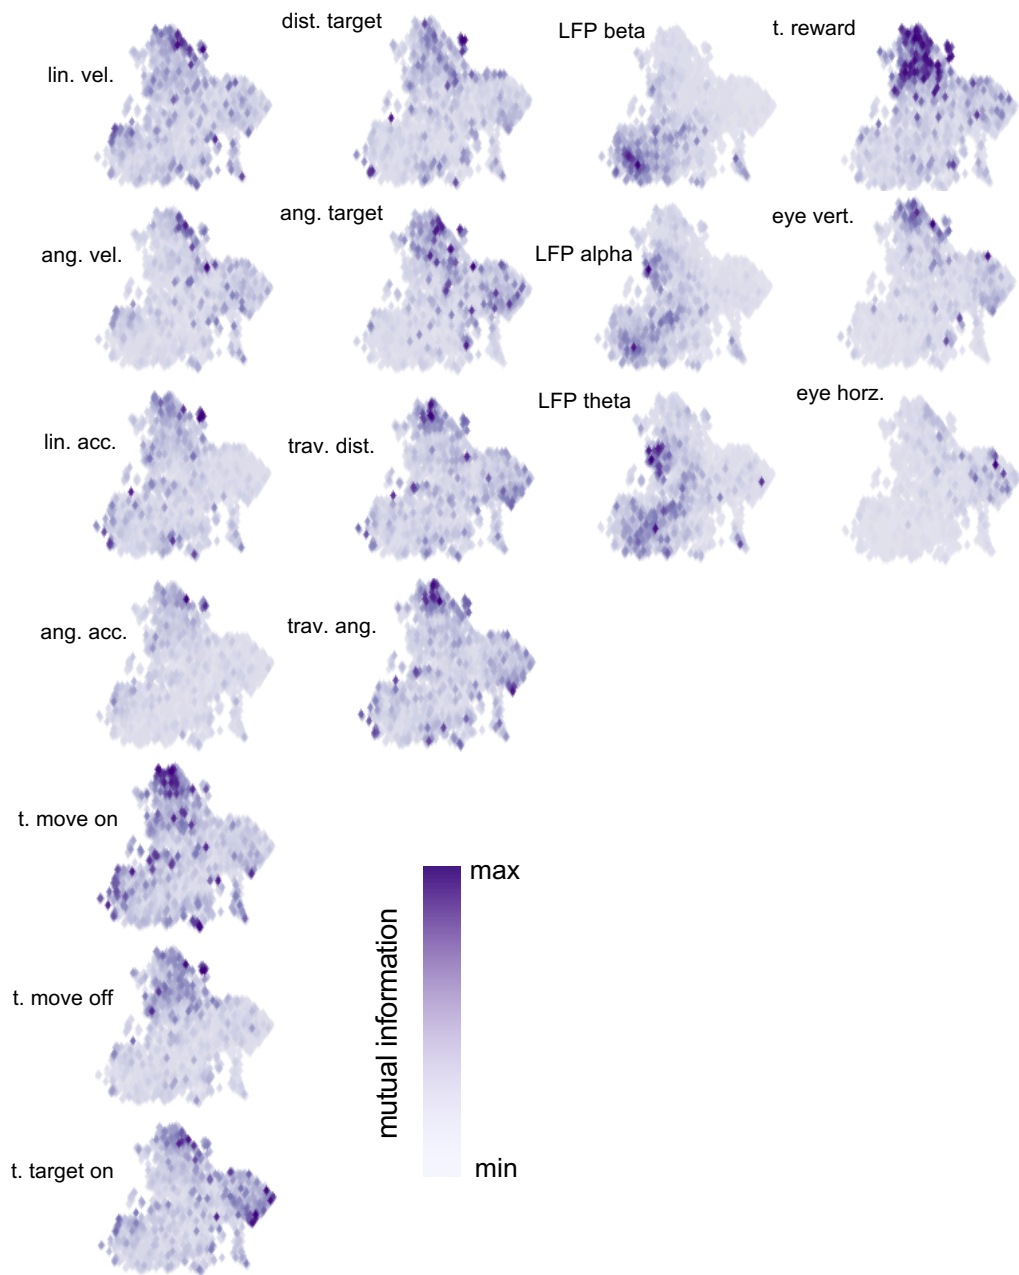

Supplement: mdarchecklist1 [file Figure4 supplement2.pdf › Figure4 supplement2.pdf]
